# Supplementary material
Source: publisher site journal article supplement (https://www.dovepress.com/article/368336)
Supplement: Supplementary file 1 [file get_supplementary_file.php]

**
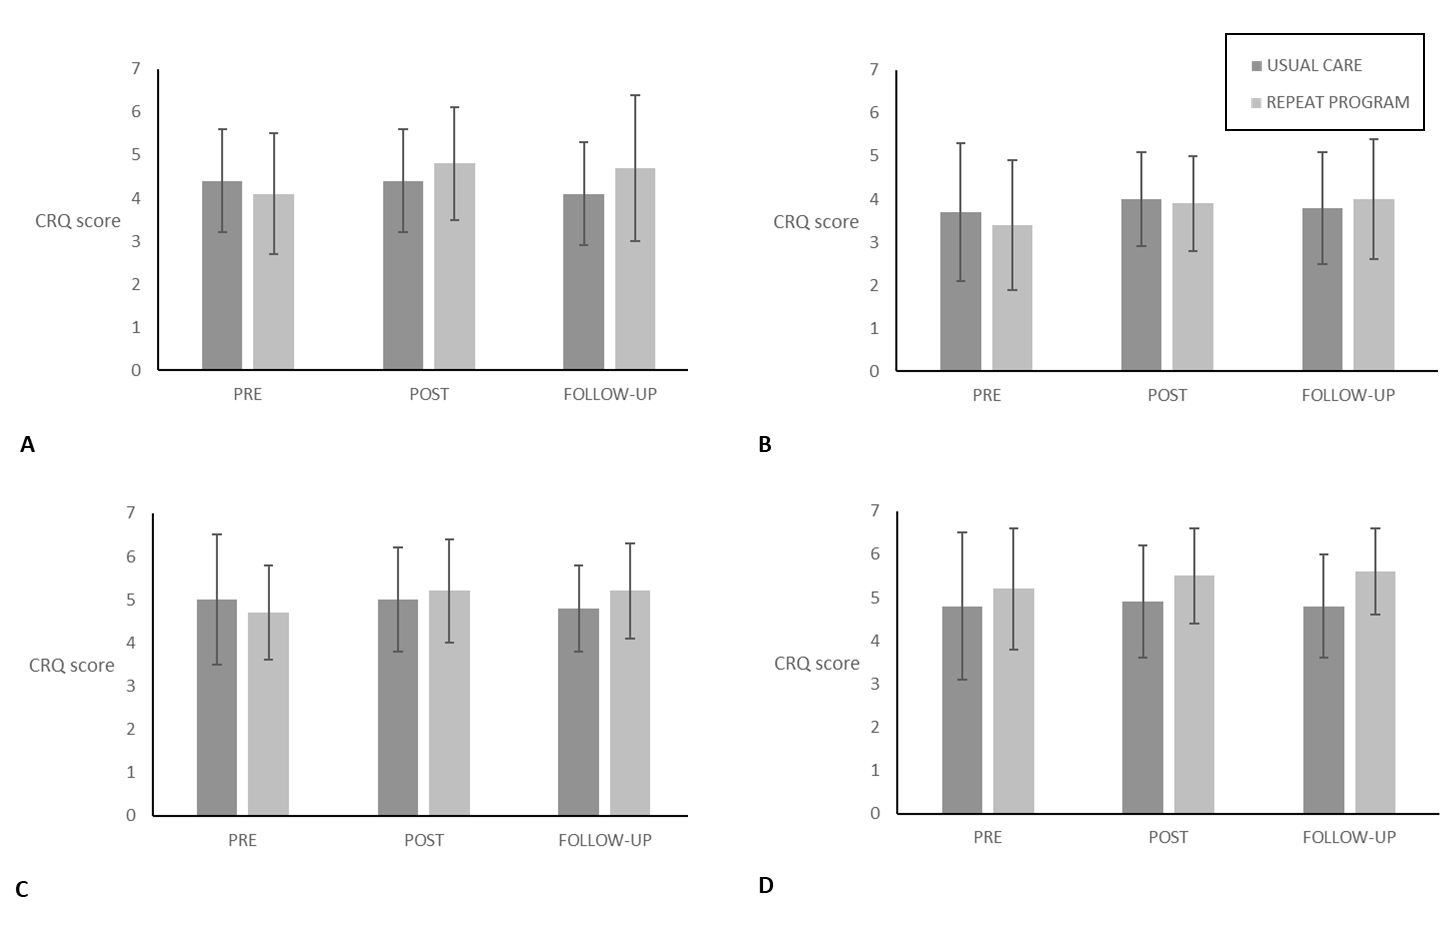
**

**Supplemental Figure 1** Health-related quality of life in RCTs: Chronic Respiratory Disease Questionnaire scores for (**A**) dyspnea, (**B**) fatigue, (**C**) emotional function and (**D**) mastery domains (1 study). Data from Carr S, Hill K, Brooks D, Goldstein R. Pulmonary rehabilitation after acute exacerbation of chronic obstructive pulmonary disease in patients who previously completed a pulmonary rehabilitation program. *Journal of Cardiopulmonary Rehabilitation and Prevention*. 2009;29:318-324. doi:10.1097/HCR.0b013e3181ac7bb8.1

**Notes:** Data are mean ± SD.

**Abbreviation:** CRQ, Chronic Respiratory Disease Questionnaire.

**
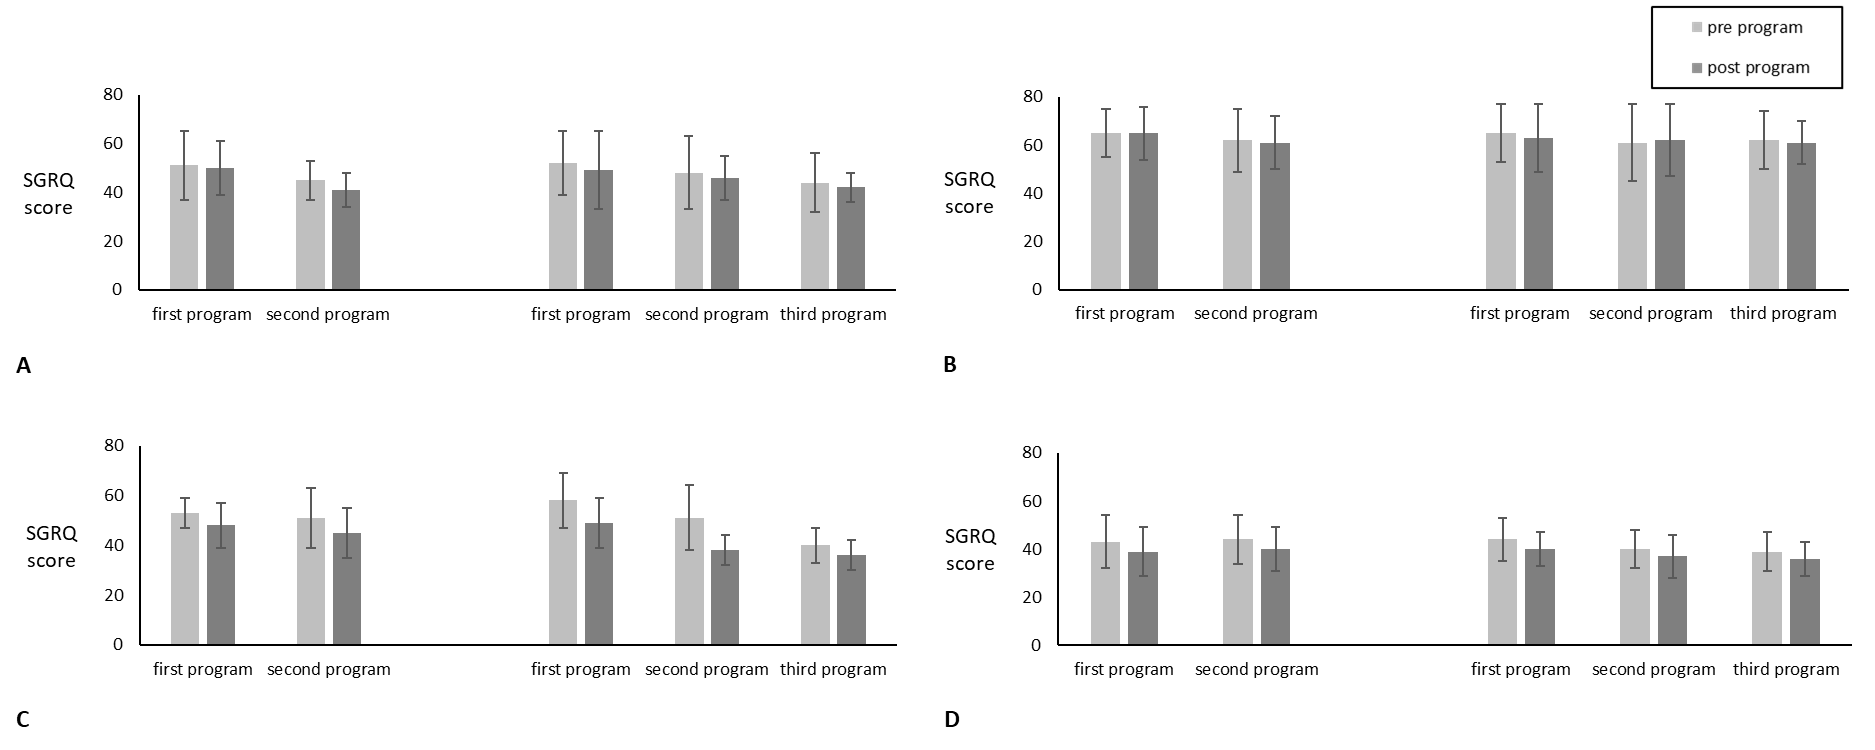
**

**Supplemental Figure 2** Health-related quality of life in RCTs: St George Respiratory Questionnaire scores for (**A**) total, (**B**) activity, (**C**) symptoms and (**D**) impacts domains (1 study). Data from Romagnoli M, Dell'Orso D, Lorenzi C, et al. Repeated pulmonary rehabilitation in severe and disabled COPD patients. *Respiration*. 2006;73:769-776. doi:10.1159/000092953.2

**Notes:** Data are mean ± SD.

**Abbreviation:** SGRQ, St George Respiratory Questionnaire.

**
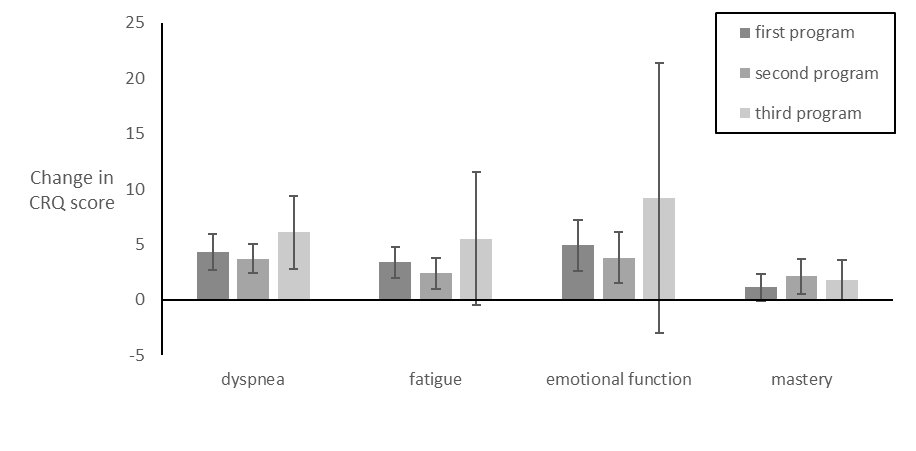
**

**Supplemental Figure 3** Health-related quality of life in non-randomized studies: Change in Chronic Respiratory Disease Questionnaire domain scores (1 study). Data from Heng H, Lee A, Holland A. Repeating pulmonary rehabilitation: Prevalence, predictors and outcomes. *Respirology*. 2014;19:999-1005. doi:10.1111/resp.12365.3

**Notes:** Data are mean difference ± 95% CI**.**

**Abbreviation:** CRQ, Chronic Respiratory Disease Questionnaire.

**
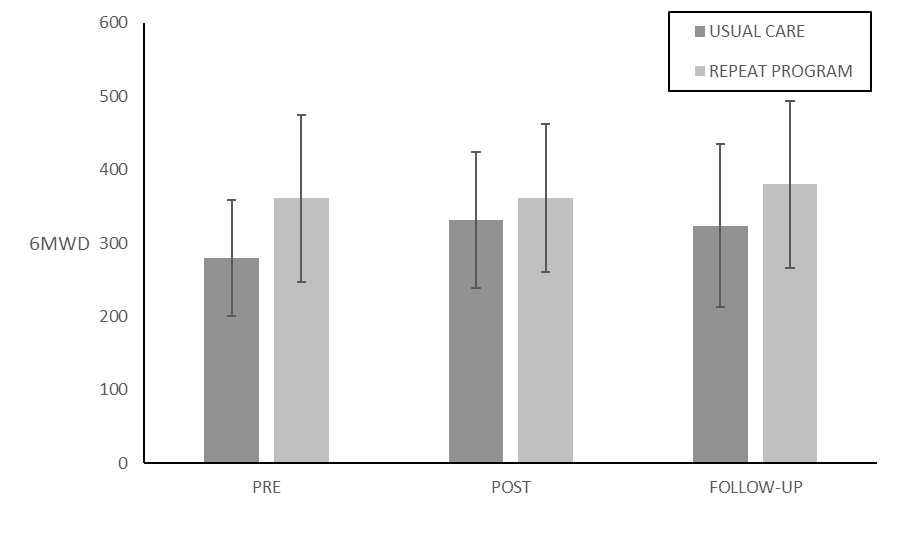
**

**Supplemental Figure 4** Exercise capacity in RCTs: Distance walked on six-minute walk test (1 study). Data from Carr S, Hill K, Brooks D, Goldstein R. Pulmonary rehabilitation after acute exacerbation of chronic obstructive pulmonary disease in patients who previously completed a pulmonary rehabilitation program. *Journal of Cardiopulmonary Rehabilitation and Prevention*. 2009;29:318-324. doi:10.1097/HCR.0b013e3181ac7bb8.1

**Notes:** Data are mean ± SD.

**Abbreviation:** 6MWD, distance walked on six-minute walk test (m).

**
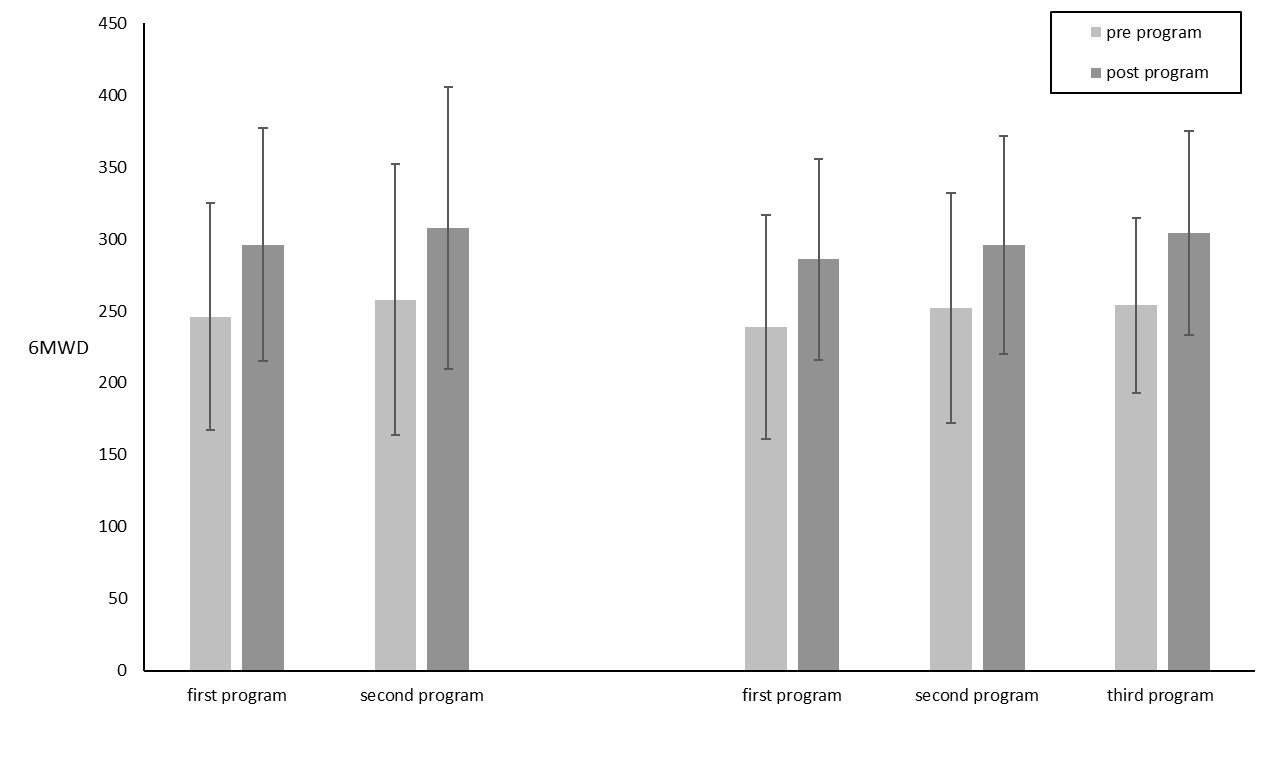
**

**Supplemental Figure 5** Exercise capacity in RCTs: Distance walked on six-minute walk test (1 study). Data from Romagnoli M, Dell'Orso D, Lorenzi C, et al. Repeated pulmonary rehabilitation in severe and disabled COPD patients. Respiration. 2006;73:769-776. doi:10.1159/000092953.2

**Notes:** Data are mean ± SD.

**Abbreviation:** 6MWD, distance walked on six-minute walk test (m).

**Supplemental Table 1** Search strategy for Medline, Embase, CENTRAL (Cochrane Central Register of Controlled Trials) and CINAHL (Cumulative Index to Nursing and Allied Health Literature).

| **MEDLINE, Embase, CENTRAL** | **CINAHL** |
| --- | --- |
| 1. repeat*.mp. | 1. (TX “repeat*”) |
| 2. Lung Diseases, Obstructive/ | 2. (TX “Lung Diseases, Obstructive”) |
| 3. exp Pulmonary Disease, Chronic Obstructive/ | 3. (TX “Pulmonary Disease, Chronic Obstructive+”) |
| 4. emphysema*.mp. | 4. (TX “emphysema*”) |
| 5. (chronic* adj3 bronchiti*).mp. | 5. (TX “chronic*” N3 “bronchiti*”) |
| 6. (obstruct* adj3 (pulmonary or lung* or airway* or airflow* or bronch* or respirat*)).mp. | 6. (TX “obstruct*” N3 (“pulmonary” or “lung*” or “airway*” or “airflow*” or “bronch*” or “respirat*”)) |
| 7. COPD.mp. | 7. (TX “COPD”) |
| 8. COAD.mp. | 8. (TX “COAD”) |
| 9. COBD.mp. | 9. (TX “COBD”) |
| 10. AECB.mp. | 10. (TX “AECB”) |
| 11. 2 or 3 or 4 or 5 or 6 or 7 or 8 or 9 or 10 | 11. 2 or 3 or 4 or 5 or 6 or 7 or 8 or 9 or 10 |
| 12. exp Exercise Therapy/ | 12. (MH "Physical Therapy+") |
| 13. exp exercise/ | 13. (MH "Exercise") |
| 14. exp Physical Fitness/ | 14. (MH "Physical Fitness") |
| 15. rehabilitation/ | 15. (MH "Rehabilitation") |
| 16. exp Physical Therapy Modalities/ | 16. (MH "Rehabilitation, Pulmonary+") |
| 17. exp Physical exertion/ | 17. (MH "Exertion") |
| 18. (rehabilitat* or fitness* or exercis* or physical* or train* or active* or activit* or physiotherap* or kinesiotherap* or exert*).mp. | 18. rehabilitat* or fitness* or exercis* or physical* or train* or active* or activit* or physiotherap* or kinesiotherap* or exert* |
| 19. 12 or 13 or 14 or 15 or 16 or 17 or 18 | 19. 12 OR 13 OR 14 OR 15 OR 16 OR 17 OR 18 |
| 20. 11 and 19 | 20. 11 AND 19 |
| 21. 1 and 20 | 21. 1 and 20 |
| 22. limit 21 to English language | 22. limit 21 to English language |

**Supplemental Table 2** Search strategy for PEDro (Physiotherapy Evidence Database)

| Abstract and Title: | repeat | |
| --- | --- | --- |
| Sub discipline: | cardiothoracics | |
| Topic: | chronic respiratory disease | |
| Problem | reduced exercise tolerance | |
|  | Therapy: | fitness training  respiratory therapy  education |

**Supplemental Table 3** Characteristics of included studies

| **RCTs (n=2)** |
| --- |
| **Carr et al. 20091**  DATES/LOCATION: 2003-2006, West Park Healthcare Center, Toronto (Canada)  DESIGN: RCT; both groups undertook initial program: randomized to repeat program or usual care if developed exacerbation within 12 months of initial program  INCLUSION CRITERIA: Undertook initial program; moderate to severe COPD [GOLD criteria]; "adequate communication skills"  EXCLUSION CRITERIA: Required mechanical ventilation; "comorbid conditions that might adversely influence outcome measures"  ASSESSMENT TIMEPOINTS: Last assessment pre- exacerbation; 2 weeks post initiation of medical treatment; T2: 3 weeks post medical treatment; T3: 12 weeks post initiation of medical treatment  PRIMARY OUTCOME: Health-related quality of life (CRQ)  SECONDARY OUTCOMES: Exercise capacity (6MWD); pharmacological treatment; unscheduled physician or emergency department visits or hospitalizations  FUNDING/COI STATEMENT: Both |
| **Romagnoli et al. 20062**  DATES/LOCATION: Italy  DESIGN: RCT; both groups undertook initial program: randomized to repeat program at 6- and 12-months (group 1) or 12 months  INCLUSION CRITERIA: Diagnosis of COPD (FEV1 50% predicted +/- chronic respiratory failure); completed initial program; Medical Research Council score 3; stable condition (free from exacerbation for 4 weeks pre-program)  EXCLUSION CRITERIA: Other organ failure or cancer; unable to cooperate  ASSESSMENT TIMEPOINTS: Pre/post program  PRIMARY OUTCOME: Respiratory muscle strength  SECONDARY OUTCOMES: Exercise capacity (6MWD); health-related quality of life (SGRQ); number of respiratory-related hospitalizations and length of stay within 12 months of initial program  FUNDING/COI STATEMENT: Nil |
| **Non-randomized studies (n=8)** |
| **Al Chikhanie et a. 20214**  DATES/LOCATION: Jan 2012-Dec 2017 Dieulefit Sante, Drome (France)  DESIGN: Retrospective cohort; patients who repeated programs  INCLUSION CRITERIA: Diagnosis of COPD; undertook at least two programs during study period  EXCLUSION CRITERIA: Admitted after an exacerbation or hospitalization, hospital readmission <10 months or >14 months after initial program, data from ≥4 6MWT (pre and post initial and first repeat program), program duration <3 weeks or >5 week  ASSESSMENT TIMEPOINTS: Pre/post program  PRIMARY OUTCOMES: Exercise capacity (6MWD, MCID ≥30m)  SECONDARY OUTCOME: Adherence (number of sessions attended; not reported)  FUNDING/COI STATEMENT: Both |
| **Atabaki et al. 20155**  DATES/LOCATION: 2000-2012 Norwalk Hospital and St Francis Hospital, Connecticut (USA)  DESIGN: Retrospective cohort; patients who did and did not repeat program  INCLUSION CRITERIA: Clinical diagnosis of COPD; referred to pulmonary rehabilitation; "met our inclusion criteria”  EXCLUSION CRITERIA: Not stated  ASSESSMENT TIMEPOINTS: Pre-program, within 4 weeks post-program  PRIMARY OUTCOMES: Exercise capacity (6MWD, MCID ≥35m)  SECONDARY OUTCOME: Adherence (number of sessions attended)  FUNDING/COI STATEMENT: Nil funding statement |
| **Foglio et al. 20076**  DATES/LOCATION: Recruitment: January 1996 to June 1998; observational period ended June 2005, Scientific Institute of Gussago, Salvatore Maugeri Foundation (Italy)  DESIGN: Prospective observational; participants who undertook 5 programs over 7 years  INCLUSION CRITERIA: Initial program; diagnosis of COPD (smoking history >10 pack-years, post-bronchodilator FEV1 <80% predicted, FER <0.7); non-smoking; stable condition (no respiratory acidosis, free from exacerbation for 4 weeks pre-program  EXCLUSION CRITERIA: Post-bronchodilator (200 mcg of salbutamol) change in FEV1 >15% or >200 ml; other organ failure, cancer or inability to cooperate  ASSESSMENT TIMEPOINTS: Pre/post program  PRIMARY OUTCOME: Pulmonary function tests  SECONDARY OUTCOMES: Exercise capacity (symptom limited incremental cycle test; 6MWD, MCID ≥54m); dyspnea, health-related quality of life (SGRQ total score, MCID ≥4%); number of hospitalizations and exacerbations; mortality  FUNDING/COI STATEMENT: Nil funding statement |
| **Heng et al. 20143**  DATES/LOCATION: 2001-2009, The Alfred, Melbourne (Australia)  DESIGN: Retrospective cohort; patients who did and did not repeat program  INCLUSION CRITERIA: Diagnosis of COPD; exertional dyspnea; completed initial program (data available for pre- and post-program assessment)  EXCLUSION CRITERIA: Severe cognitive impairment; any musculoskeletal or neurological disorders that prevented the safe completion of exercise  ASSESSMENT TIMEPOINTS: Pre/post program  PRIMARY OUTCOME: Proportion of patients who undertook repeat program  SECONDARY OUTCOMES: Exercise capacity (6MWD, MCID ≥25m); health-related quality of life (CRQ, MCID ≥0.5 points per question within each domain)  FUNDING/COI STATEMENT: Nil |
| **Ingram et al. 20147**  DATES/LOCATION: September 2009 to August 2013  DESIGN: Observational (abstract); patients who repeated program  INCLUSION CRITERIA: Diagnosis of COPD; completed two programs at least 1 year apart  EXCLUSION CRITERIA: Not stated  ASSESSMENT TIMEPOINTS: Pre/post program  PRIMARY/SECONDARY OUTCOMES: Health-related quality of life (CRQ, "improved" ≥10 points); Exercise capacity (ISWD, "improved" ≥47.5m)  FUNDING/COI STATEMENT: Nil |
| **Foglio et al. 20076**  DATES/LOCATION: September 2001 to September 2013, Two university hospital centers (Westmead and Mount Druitt Hospitals), New South Wales (Australia)  DESIGN: Retrospective cohort; patients who repeated program  INCLUSION CRITERIA: Patients with COPD; completed >1 program  EXCLUSION CRITERIA: Not stated  ASSESSMENT TIMEPOINTS: Pre/post program  PRIMARY/SECONDARY OUTCOMES: Exercise capacity (6MWD, MCID ≥30m); Health-related quality of life (SGRQ, MCID ≥4 units); time interval between programs; pulmonary function tests  FUNDING/COI STATEMENT: Nil funding statement |
| **Storey et al. 20198**  DATES/LOCATION: The Alfred, Melbourne (Australia)  DESIGN: Retrospective cohort; qualitative  INCLUSION CRITERIA:   - Patients: diagnosis of COPD (confirmed on spirometry); ≥2 programs within the previous 18 months - Health professionals: respiratory physicians, advanced medical trainees, physiotherapists or nurses who had referred people with COPD to pulmonary rehabilitation   EXCLUSION CRITERIA: not stated  ASSESSMENT TIMEPOINTS: Interviews undertaken within 18 months of repeat program  PRIMARY OUTCOMES: Qualitative  SECONDARY OUTCOMES: Exercise capacity (6MWD)  FUNDING/COI STATEMENT: Both |
| **Yeşiloğlu et al. 20189**  DATES/LOCATION: Ankara Atatürk Chest Disease and Surgery Research and Education Hospital (Turkey)DESIGN:  INCLUSION CRITERIA: Diagnosis of COPD confirmed by chest physician [GOLD criteria]  EXCLUSION CRITERIA: Arthritis, unstable cardiovascular, neurological, cognitive, psychiatric diseases, patients with missing data, patients lost to follow-up and those who had exacerbations during program or time of follow-up assessment  ASSESSMENT TIMEPOINTS: Pre/post program  PRIMARY/SECONDARY OUTCOMES: Health-related quality of life (CRQ, SGRQ); exercise capacity (ISWD); pulmonary function tests; body mass index  FUNDING/COI STATEMENT: Nil |

**Abbreviations:** COPD, chronic obstructive pulmonary disease; CRQ, chronic respiratory disease questionnaire; COI, conflict of interest; FER, forced expiratory ratio; FEV1, forced expiratory volume in one second; GOLD, Global Initiative for Chronic Obstructive Lung Disease; ISWD, distance walked on incremental shuttle walk test; MCID, minimal clinically important difference, 6MWD, distance walked on six-minute walk test; SGRQ, St George Respiratory Questionnaire.

**Supplemental Table 4** Pulmonary rehabilitation program features

|  | Indication for repeat program | Structure of program | Exercise component | Education component |
| --- | --- | --- | --- | --- |
| **RCTs (n=2)** | | | | |
| Carr et al. 20091 | Randomized if developed exacerbation within 12 months of initial program: repeat program or usual care | Inpatient/outpatient based on preference INITIAL PROGRAM either 12 weeks outpatient program (3 sessions per week) or 6 weeks inpatient program (daily exercise)  REPEAT PROGRAM 9 to 15 2-hour sessions over 3 weeks | Strength and interval training (corridor and treadmill walking or cycling, progression of intensity determined by symptom limitation) | Breathing exercises; energy conservation; lung health; medications; stress management |
| Romagnoli et al. 20062 | Randomized post initial program: repeat twice at 6 and 12 months, repeat once at 12 months | 18 sessions | Strength (progression 300-1000g, 10 repetitions); endurance training (70-80% of maximal baseline load) | Disease education; behavioral, nutritional, psychosocial counselling |
| **Non-randomized studies (n=8)** | | | | |
| Storey et al. 20198 | Referred for worsening functional capacity, exacerbation or hospitalization | x | x | x |
| Al Chikhanie et al. 20214 | Referred by specialist at year follow-up | Inpatient, 3-4 weeks, 5 days per week | Strength and endurance training (115 min exercise) | COPD, oxygen, stress management, physical activity, psychosocial counselling |
| Atabaki et al. 20155 | Referred by their primary care physician or specialist on the basis of clinical assessment | Center 1: 24 individual sessions; Center 2: 16 group sessions | Strength and endurance training (50-70% of maximal baseline load) | Disease education; behavioral, nutritional and psychosocial counselling |
| Heng et al. 20143 | Stable state or post-exacerbation | 6-11 weeks, 2 sessions per week (90 min exercise, 60 min education) | Strength and endurance training (initial prescription and progression according to standard recommendations) | Exercise, symptoms management, self-management training, psychological support, nutritional advice |
| Sandoz et al. 201710 | Referred by general practitioners or respiratory physicians, medically optimized symptomatic lung disease | 8-12 weeks, 3 sessions per week (minimum 18 sessions), weekly education | Strength (20 min) and endurance training (20 min ground walking, minimum 10 min treadmill, cycle or arm ergometer) | “topics according to published guidelines” |
| Foglio et al. 20076 | Repeat programs 12–18 months following initial program “according to logistic needs of patients and hospital” | 8-10 weeks, 3 sessions per week (3 hours); 7-year follow-up (review 6-monthly) | Strength and endurance training (30 min, 50-70% of maximal baseline load) | Patient and family education; nutritional and psychosocial counselling |
| Ingram et al. 20147 | Not stated (abstract only) | x | x | x |
| Yeşiloğlu et al. 20189 | “If the patient's exercise capacity, quality of life, perception of dyspnea deteriorated more than the minimal clinically significant value in two consecutive follow-ups”  [every 3 months in first year post initial program, then every 6 months] | 8 weeks, 2 sessions per week (70-90 min) | Strength (5-10 min, starting at 45-50% 1RM for two sets, and 10 repetitions per set during the first 3-5 sessions, then weights were increased to 70% 1RM) and endurance training (15 min, cycle ergometer and treadmill training, workload on cycle ergometer and 60-85% of VO2peak on treadmill; individual progression of intensity) | Disease education; medication; bronchial hygiene techniques; breathing control techniques; energy conservation; relaxation; exercise training; psychological and nutritional support |

**Notes:** x, not reported.

**Abbreviations:** 1RM, one-repetition maximum; VO2peak, peak oxygen uptake

**Supplemental Table 5** Participant characteristics at baseline: RCTs (2 studies)

|  | Non-repeaters | Repeaters | | |
| --- | --- | --- | --- | --- |
| Carr et al. 20091 | n=17, 65% female  Age 68 (9) years  FEV1 0.82 (0.33) litres |  | n=17, 47% female  Age 68 (7) years  FEV1 0.99 (0.57) litres | |
| Romagnoli et al. 20062 | x | Repeat once: n=15, 27% female  Age 70 (8) years  FEV1 36 (7) % predicted | | Repeat twice: n=14, 43% female  Age 69 (8) years  FEV1 37 (9) % predicted |

**Notes:** Data are mean (SD) unless indicated; FEV1 expressed as % predicted unless indicated; x, not reported.

**Abbreviations:** FEV1, forced expiratory volume in one second.

**Supplemental Table 6** Participant characteristics: non-randomized studies (8 studies)

|  | 1st program | | 2nd program | 3rd program |
| --- | --- | --- | --- | --- |
| Non-repeaters | Repeaters |
| Al Chikhanie et al. 20214 | x | n=190, 53% female  Age 66 [59 to 75] years  FEV1 46 [33 to 63] | n=190 | n=62 |
| Storey et al. 20198 | x | n=14, 50% female  Age 69 (10) years  FEV1 51 (15) | n=14, 50% female  FEV1 45 (15) | x |
| Atabaki et al. 20155 | n=69, 56% female  Age 70 (10) years  FEV1 51 (22) | n=37, 54% female  Age 68 (8) yrs  FEV1 43 (17) | n=37, 54% female  Age 71 (8) years  FEV1 41 (17) | x |
| Heng et al. 20143 | n=162, 40% female  Age 69 (10) years  FEV1 48 (20) | n=53, 42% female  Age 67 (8) years  FEV1 45 (21) | n=53  FEV1 42 (21) | n=10  FEV1 36 (27) |
| Sandoz et al. 201710 | x | n=141, 44% female  Age 68 (7) years  FEV1 42 (17) | n=141, 44% female  FEV1 39 (16) | n=35, 36% female  FEV1 35 (16) |
| Foglio et al. 20076 | x | n=48, 31% female  Age 60 (8) years  FEV1 58 (16) | n=48, 31% female  FEV1 58 (16) | 3rd program FEV1 56 (15) |
| 4th program FEV1 56 (16) |
| 5th program FEV1 55 (15) |
| Ingram et al. 20147 | x | n=125 | n=125  FEV1 MD 0.92 (95%CI -1.2 to 3.0) | x |
| Yeşiloğlu et al. 20189 | x | n=16, 12% female  Age 66 (9) years  FEV1 29 (10) | n=16, 12% female  FEV1 28 (11) | x |

**Notes:** Data are mean (SD) or median [IQR] unless indicated; FEV1 expressed as % predicted unless indicated; x, not reported.

**Abbreviations:** FEV1, forced expiratory volume in one second.

**Supplemental Table 7** Risk of bias in RCTs: Cochrane risk of bias tool (2 studies)1,2

| Domains11 | Carr et al. 2009 | Romagnoli et al. 2006 |
| --- | --- | --- |
| Random sequence generation (selection bias) | unclear | unclear |
| Allocation concealment (selection bias) | unclear | unclear |
| Blinding of participants and personnel (performance bias) | unclear | unclear |
| Blinding of outcome assessment (detection bias) | adequate | unclear |
| Incomplete outcome data (attrition bias) | adequate | adequate |
| Selective reporting (reporting bias) | unclear | unclear |
| Other bias | adequate | adequate |
| Overall risk of bias | high* | high* |

**Notes: *** high (>2 domains rated as unclear)

**Supplemental Table 8** Risk of bias in non-randomized studies: Standard Quality Assessment Criteria (8 studies)3-10

|  |  | Standard Quality Assessment Criteria thresholds12 | |
| --- | --- | --- | --- |
|  | Score | Liberal ≤55% | Conservative ≤75% |
| Storey et al. 2019 | 95% | Did meet criteria | Did meet criteria |
| Heng et al. 2014 | 86% |
| Al Chikhanie et al. 2021 | 85% |
| Foglio et al. 2007 | 77% |
| Atabaki et al. 2015 | 73% | Did not meet criteria |
| Sandoz et al. 2017 | 64% |
| Ingram et al. 2014 | 35% | Did not meet criteria |
| Yeşiloğlu et al. 2018 | 27% |

**Supplemental Table 9** Health-related quality of life in non-randomized studies: Change in St George Respiratory Questionnaire domain scores (1 study)6

|  | Change in SGRQ domain scores (%) | | |
| --- | --- | --- | --- |
|  | Symptoms | Activity | Impact |
| 1st program | -2.96 (13.89) | -10.44 (12.84) | -4.91 (11.12) |
| 2nd program | -4.84 (10.15) | -11.51 (13.35) | -4.24 (8.51) |
| 3rd program | -4.53 (12.94) | -8.31 (11.02) | -4.71 (9.02) |
| 4th program | -5.73 (16.41) | -2.11 (8.61) | -4.67 (10.25) |
| 5th program | -9.18 (17.26) | -3.13 (11.82) | -4.58 (8.53) |
| p* | 0.198 | <0.001 | 0.023 |

**Notes:** Data are mean difference (SD). *post-program changes.

**Abbreviation:** SGRQ, St George Respiratory Questionnaire.

**Supplemental Table 10** Exercise capacity in non-randomized studies: Difference between first and subsequent programs in the within-group change in distance walked on the six-minute walk test (6 studies)

|  | Difference between change in 6MWD for subsequent programs compared to the first program | | | | | |
| --- | --- | --- | --- | --- | --- | --- |
| Storey et al. 2019 | Atabaki et al. 2015 | Sandoz et al. 2017 | Al Chikhanie et al. 2021 | Heng et al. 2014 | Foglio et al. 2007 |
| 2nd program – 1st program | -5 (-38 to 28)  n=14 | -19 (-37 to -1)  n=37 | -16 (-31 to -2)  n=136 | -21 (-26 to -16)  n=190 | -30 (-51 to -10)  n=141 | 0 (-19 to 19)  n=48 |
| 3rd program – 1st program | x | x | -27 (-58 to 3)  n=33 | -10 (-25 to 5)  n=62 | -65 (-51 to 191)  n=7 | -2 (-24 to 20)  n=48 |
| 4th program – 1st program | x | x | x | x | x | -20 (-42 to 2)  n=48 |
| 5th program – 1st program | x | x | x | x | x | -31 (-53 to -9)  n=48 |

**Notes:** Data are MD (95% CI), metres; x, not reported.

**Abbreviations:** 6MWD, distance walked on six-minute walk test (m).

**Supplemental Table 11** Exercise capacity in non-randomized studies: Peak workload (1 study)6

|  | Assessment timepoint | |
| --- | --- | --- |
|  | Pre-program | Post-program |
| 1st program | 79 (18) | 95 (18)* |
| 2nd program | 83 (19) | 94 (19)* |
| 3rd program | 81 (16) | 94 (16)* |
| 4th program | 82 (18) | 90 (16)* |
| 5th program | 78 (16) | 82 (16) |

**Notes:** Data are mean (SD) in watts, extracted from figure; *p<0.001 improvement post- vs. pre-program.

**Supplemental Table 12** Hospitalizations and exacerbations in non-randomized studies (1 study)6

|  | Number of episodes per participant, mean (SD) | | Number of participants free from episode, n (%) | |
| --- | --- | --- | --- | --- |
| Exacerbation | Hospitalizations | Exacerbation | Hospitalizations |
| Year before 1st program | 2.50 (0.90) | 0.68 (0.09) | 1 (2) | 20 (42) |
| Year after 1st program | 1.02 (0.86)* | 0.08 (0.04)* | 14 (29)* | 44 (92)* |
| Year after 2nd program | 0.81 (0.73)* | 0.08 (0.05)* | 17 (35)* | 45 (94)* |
| Year after 3rd program | 0.79 (0.77)* | 0.02 (0.02)* | 19 (40)* | 47 (98)* |
| Year after 4th program | 0.96 (0.07)* | 0.15 (0.05)* | 13 (27)* | 40 (83)* |

**Notes**: *p<0.001 compared to year before 1st program.

**REFERENCES**

1. Carr S, Hill K, Brooks D, Goldstein R. Pulmonary rehabilitation after acute exacerbation of chronic obstructive pulmonary disease in patients who previously completed a pulmonary rehabilitation program. *Journal of Cardiopulmonary Rehabilitation and Prevention*. 2009;29:318-324. doi:10.1097/HCR.0b013e3181ac7bb8

2. Romagnoli M, Dell'Orso D, Lorenzi C, et al. Repeated pulmonary rehabilitation in severe and disabled COPD patients. *Respiration*. 2006;73:769-776. doi:10.1159/000092953

3. Heng H, Lee A, Holland A. Repeating pulmonary rehabilitation: Prevalence, predictors and outcomes. *Respirology*. 2014;19:999-1005. doi:10.1111/resp.12365

4. Al Chikhanie Y, Bailly S, Amroussia I, Veale D, Herengt F, Verges S. Trajectories of COPD patients’ response to repeated pulmonary rehabilitation programs. *Respiratory Medicine*. 2021;190:106678. doi:10.1016/j.rmed.2021.106678

5. Atabaki A, Fine J, Haggerty M, et al. Effectiveness of repeated courses of pulmonary rehabilitation on functional exercise capacity in patients with COPD. *Journal of Cardiopulmonary Rehabilitation and Prevention*. 2015;35:272-277. doi:10.1097/HCR.0000000000000115

6. Foglio K, Bianchi L, Bruletti G, et al. Seven-year time course of lung function, symptoms, health-related quality of life, and exercise tolerance in COPD patients undergoing pulmonary rehabilitation programs. *Respiratory Medicine*. 2007;101:1961-1970. doi:10.1016/j.rmed.2007.04.007

7. Ingram K, Canavan J, Kon S, et al. Repeat pulmonary rehabilitation programmes: Are they beneficial in COPD? [abstract]. *European Respiratory Journal*. 2014;44:P610.

8. Storey S, Erbas B, Holland A. Why do people with chronic obstructive pulmonary disease repeat pulmonary rehabilitation? Perspectives of patients and health professionals. *Chronic Respiratory Disease*. 2018;16:1-8. doi:10.1177/1479973118816420

9. Yeşiloğlu E, Candemir I, Ergün P, Kaymaz D, Demir N, Şengül F. The efficiency of pulmonary re-rehabilitation [abstract]. *European Respiratory Journal*. 2018;52:PA4140. doi:10.1183/13993003.congress-2018.PA4140

10. Sandoz J, Roberts M, Cho J, Wheatley J. Magnitude of exercise capacity and quality of life improvement following repeat pulmonary rehabilitation in patients with COPD. *International Journal of COPD*. 2017;12:1085-1091. doi:10.2147/COPD.S131778

11. Higgins J, Altman D, Sterne J. Cochrane Handbook for Systematic Reviews of Interventions version 5.2.0. In: Higgins J, Churchill R, Chandler J, Cumpston M (editors). 2017:Chapter 8: Assessing risk of bias in included studies.

12. Kmet L, Lee R, Cook L. Standard quality assessment criteria for evaluating primary research papers from a variety of fields. Edmonton, Alberta, Canada: Alberta Heritage Foundation for Medical Research; 2004.
